# Supplementary material for: A temporal shift in trophic diversity among a predator assemblage in a warming Arctic
Source: R Soc Open Sci. 2018 Oct 3;5(10):180259. doi: 10.1098/rsos.180259 (PMC6227933; doi:10.1098/rsos.180259)
Supplement: Electronic Supplementary Material - Data [file rsos180259supp2.xlsx]

## Sheet: Sheet1
Species	Tissue	Year	d13C	d15N
Beluga	muscle	1982	-17.69	18.45
Beluga	muscle	1982	-17.48	19.56
Beluga	muscle	1982	-17.93	18.15
Beluga	muscle	1982	-17.96	18.83
Beluga	muscle	1982	-17.92	19.35
Beluga	muscle	1982	-17.98	17.48
Beluga	muscle	1982	-17.73	18.81
Beluga	muscle	1986	-18.02	17.66
Beluga	muscle	1986	-18.14	17.74
Beluga	muscle	1986	-18.03	18.09
Beluga	muscle	1986	-18.36	17.66
Beluga	muscle	1986	-18.3	17.76
Beluga	muscle	1986	-18.38	17.75
Beluga	muscle	1986	-17.91	18.1
Beluga	muscle	1986	-17.85	18.52
Beluga	muscle	1986	-18.03	19.14
Beluga	muscle	1986	-18.12	18.51
Beluga	muscle	1992	-18.64	17.57
Beluga	muscle	1992	-17.46	18.2
Beluga	muscle	1992	-17.88	18.07
Beluga	muscle	1992	-18.54	17.89
Beluga	muscle	1992	-17.91	17.81
Beluga	muscle	1992	-17.92	16.86
Beluga	muscle	1992	-17.48	17.21
Beluga	muscle	1992	-17.53	19.63
Beluga	muscle	1992	-17.86	19.74
Beluga	muscle	1992	-17.65	19.86
Beluga	muscle	1992	-17.8	18.59
Beluga	muscle	1994	-18.26	18.43
Beluga	muscle	1995	-17.82	17.67
Beluga	muscle	1995	-18.24	17.19
Beluga	muscle	1995	-18.6	17.75
Beluga	muscle	1995	-17.83	18.32
Beluga	muscle	1995	-18.12	18.3
Beluga	muscle	1995	-18.28	18.3
Beluga	muscle	1995	-18.27	16.83
Beluga	muscle	1995	-17.96	17.74
Beluga	muscle	1997	-18.59	16.9
Beluga	muscle	1997	-18	17.39
Beluga	muscle	1997	-18.23	17.28
Beluga	muscle	1997	-18.48	17.27
Beluga	muscle	1997	-18.68	16.36
Beluga	muscle	1997	-18.5	16.28
Beluga	muscle	1997	-18.5	16.4
Beluga	muscle	1997	-18.99	16.81
Beluga	muscle	1997	-18.48	16.44
Beluga	muscle	1997	-18.29	17.12
Beluga	muscle	2000	-18.04	17.01
Beluga	muscle	2000	-18.45	15.75
Beluga	muscle	2000	-18.27	15.95
Beluga	muscle	2001	-18.14	16.36
Beluga	muscle	2001	-18.43	15.81
Beluga	muscle	2002	-18	16.47
Beluga	muscle	2002	-17.94	16.76
Beluga	muscle	2002	-17.88	16.59
Beluga	muscle	2002	-17.67	16.59
Beluga	muscle	2002	-18.18	16
Beluga	muscle	2002	-18.15	16.18
Beluga	muscle	2002	-17.78	16.95
Beluga	muscle	2002	-18.29	16.21
Beluga	muscle	2002	-17.92	17.16
Beluga	muscle	2002	-18	16.85
Beluga	muscle	2002	-17.9	17.05
Beluga	muscle	2005	-18.33	14.65
Beluga	muscle	2005	-18.27	14.7
Beluga	muscle	2005	-17.77	15.32
Beluga	muscle	2005	-17.9	15.62
Beluga	muscle	2005	-18.19	16.51
Beluga	muscle	2005	-18.12	15.89
Beluga	muscle	2005	-18.39	16.34
Beluga	muscle	2006	-17.51	16.04
Beluga	muscle	2006	-18.33	14.91
Beluga	muscle	2006	-17.58	17.3
Beluga	muscle	2006	-17.89	17.06
Beluga	muscle	2006	-18.22	17.62
Beluga	muscle	2006	-18.43	16.39
Beluga	muscle	2007	-18.19	16.9
Beluga	muscle	2007	-18.8	16.46
Beluga	muscle	2007	-18.64	16.16
Beluga	muscle	2007	-18.83	15.69
Beluga	muscle	2008	-18.22	15.65
Beluga	muscle	2008	-17.51	15.58
Beluga	muscle	2009	-18.37	15.29
Beluga	muscle	2009	-18.19	15.81
Beluga	muscle	2009	-18.67	15.16
Beluga	muscle	2009	-18.57	15.13
Beluga	muscle	2009	-18.73	15.34
Beluga	muscle	2009	-18.72	15.17
Ringed seal	muscle	1990	-18.37	16.69
Ringed seal	muscle	1990	-18.52	16.28
Ringed seal	muscle	1990	-18.72	14.4
Ringed seal	muscle	1990	-18.76	13.02
Ringed seal	muscle	1990	-18.94	14.39
Ringed seal	muscle	1990	-19.12	13.55
Ringed seal	muscle	1990	-20.11	14.91
Ringed seal	muscle	1990	-19.29	14.8
Ringed seal	muscle	1990	-19.28	14.55
Ringed seal	muscle	1990	-18.29	15.98
Ringed seal	muscle	1990	-18.62	14.05
Ringed seal	muscle	1990	-18.8	15.85
Ringed seal	muscle	1990	-18.86	14.69
Ringed seal	muscle	1990	-18.7	15.96
Ringed seal	muscle	1990	-18.93	14.54
Ringed seal	muscle	1990	-18.56	13.97
Ringed seal	muscle	1990	-18.55	14.46
Ringed seal	muscle	1990	-17.85	14.35
Ringed seal	muscle	1990	-18.1	14.69
Ringed seal	muscle	1990	-18.92	13.57
Ringed seal	muscle	1990	-18.52	16.8
Ringed seal	muscle	1990	-19.55	14.01
Ringed seal	muscle	1990	-18.68	14.49
Ringed seal	muscle	1990	-18.59	15.34
Ringed seal	muscle	1990	-18.75	14.37
Ringed seal	muscle	1990	-18.89	14.41
Ringed seal	muscle	1990	-18.26	14.07
Ringed seal	muscle	1990	-18.18	13.01
Ringed seal	muscle	1990	-19.65	14.95
Ringed seal	muscle	1990	-18.56	14.49
Ringed seal	muscle	1990	-18.84	14.03
Ringed seal	muscle	1990	-18.33	14.21
Ringed seal	muscle	1990	-18.47	15.64
Ringed seal	muscle	1990	-18.53	15.36
Ringed seal	muscle	1990	-18.29	15.31
Ringed seal	muscle	1990	-18.76	13.63
Ringed seal	muscle	1990	-18.88	14.52
Ringed seal	muscle	1990	-18.51	13.51
Ringed seal	muscle	1990	-18.47	14.32
Ringed seal	muscle	1990	-18.28	15.47
Ringed seal	muscle	1990	-18.87	15.26
Ringed seal	muscle	1990	-18.34	13.8
Ringed seal	muscle	1990	-18.66	15.78
Ringed seal	muscle	1990	-18.29	16.5
Ringed seal	muscle	1990	-18.47	14.14
Ringed seal	muscle	1990	-18.24	15.82
Ringed seal	muscle	1990	-18.4	14.53
Ringed seal	muscle	1990	-18.14	14.67
Ringed seal	muscle	1990	-17.89	13.98
Ringed seal	muscle	1990	-18.42	15.5
Ringed seal	muscle	1992	-18.91	14.91
Ringed seal	muscle	1992	-18.52	14.42
Ringed seal	muscle	1992	-17.83	14.3
Ringed seal	muscle	1992	-18.22	13.97
Ringed seal	muscle	1992	-18.81	14.28
Ringed seal	muscle	1992	-18.55	14.42
Ringed seal	muscle	1992	-18.1	14.33
Ringed seal	muscle	1992	-19.01	14.46
Ringed seal	muscle	1992	-18.7	14.59
Ringed seal	muscle	1992	-18.79	15.39
Ringed seal	muscle	1992	-18.74	15.03
Ringed seal	muscle	1992	-17.69	16.37
Ringed seal	muscle	1992	-17.31	14.81
Ringed seal	muscle	1992	-18.86	16.29
Ringed seal	muscle	1993	-19.14	14
Ringed seal	muscle	1993	-19.09	15.33
Ringed seal	muscle	1993	-19.45	14.58
Ringed seal	muscle	1993	-18.86	14.56
Ringed seal	muscle	1993	-19.39	15.03
Ringed seal	muscle	1993	-18.96	14.61
Ringed seal	muscle	1993	-18.93	16.01
Ringed seal	muscle	1993	-19.09	15.87
Ringed seal	muscle	1993	-19.2	14.79
Ringed seal	muscle	1993	-19.27	16.25
Ringed seal	muscle	1993	-19.28	16.46
Ringed seal	muscle	1993	-19.02	16.04
Ringed seal	muscle	1993	-19.24	15.58
Ringed seal	muscle	1996	-19	15.68
Ringed seal	muscle	1996	-19.7	15.34
Ringed seal	muscle	1996	-18.45	15.96
Ringed seal	muscle	1996	-18.73	15.84
Ringed seal	muscle	1996	-19.04	16.02
Ringed seal	muscle	1996	-19.43	16.34
Ringed seal	muscle	1996	-19.17	16.47
Ringed seal	muscle	1996	-18.88	16.27
Ringed seal	muscle	1996	-18.82	15.55
Ringed seal	muscle	1996	-19.26	13.46
Ringed seal	muscle	1996	-19.28	14.96
Ringed seal	muscle	1996	-19.54	15.54
Ringed seal	muscle	1996	-18.87	16.33
Ringed seal	muscle	1996	-19.39	16.4
Ringed seal	muscle	1996	-19.1	16.21
Ringed seal	muscle	1996	-18.01	16.1
Ringed seal	muscle	1996	-18.54	15.55
Ringed seal	muscle	1996	-17.99	16.58
Ringed seal	muscle	1996	-16.83	17.29
Ringed seal	muscle	1996	-17.98	15.84
Ringed seal	muscle	1996	-17.65	16.57
Ringed seal	muscle	1996	-19.32	15.08
Ringed seal	muscle	1999	-18.95	16.17
Ringed seal	muscle	1999	-18.43	14.62
Ringed seal	muscle	1999	-18.1	14.25
Ringed seal	muscle	1999	-19.24	14.47
Ringed seal	muscle	1999	-18.8	17.33
Ringed seal	muscle	1999	-19.3	15.33
Ringed seal	muscle	2002	-19.41	16.79
Ringed seal	muscle	2002	-18.99	15.83
Ringed seal	muscle	2002	-17.79	16.1
Ringed seal	muscle	2002	-19.14	15.36
Ringed seal	muscle	2002	-19.41	15.25
Ringed seal	muscle	2002	-19.56	14.65
Ringed seal	muscle	2002	-17.51	15.97
Ringed seal	muscle	2002	-19.14	14.13
Ringed seal	muscle	2002	-18.12	15.87
Ringed seal	muscle	2002	-19.05	15.88
Ringed seal	muscle	2002	-18.38	14.63
Ringed seal	muscle	2002	-18.59	14.66
Ringed seal	muscle	2002	-18.69	16.16
Ringed seal	muscle	2002	-19.08	15.89
Ringed seal	muscle	2002	-19.14	14.33
Ringed seal	muscle	2002	-19.69	15.68
Ringed seal	muscle	2002	-17.33	15.86
Ringed seal	muscle	2002	-17.89	15.88
Ringed seal	muscle	2002	-18.85	15.86
Ringed seal	muscle	2002	-17.67	16.49
Ringed seal	muscle	2002	-19.39	14.68
Ringed seal	muscle	2002	-18.65	15.06
Ringed seal	muscle	2002	-18.98	14.44
Ringed seal	muscle	2002	-18.96	14.96
Ringed seal	muscle	2002	-19.46	15.16
Ringed seal	muscle	2002	-18.94	15.99
Ringed seal	muscle	2002	-19.43	14.93
Ringed seal	muscle	2002	-18.89	15.96
Ringed seal	muscle	2002	-17.86	15.28
Ringed seal	muscle	2002	-18.97	15.06
Ringed seal	muscle	2002	-18.13	16.74
Ringed seal	muscle	2002	-18.93	14.64
Ringed seal	muscle	2002	-18.25	15.59
Ringed seal	muscle	2002	-17.6	16.13
Ringed seal	muscle	2002	-18.45	14.98
Ringed seal	muscle	2002	-18.25	17.79
Ringed seal	muscle	2002	-18.88	14.87
Ringed seal	muscle	2002	-19.03	14.06
Ringed seal	muscle	2002	-18.98	15.03
Ringed seal	muscle	2002	-18.6	13.8
Ringed seal	muscle	2002	-19.28	13.55
Ringed seal	muscle	2002	-19.49	15.16
Ringed seal	muscle	2002	-17.01	17.21
Ringed seal	muscle	2002	-19.34	13.82
Ringed seal	muscle	2002	-19.03	13.7
Ringed seal	muscle	2002	-18.62	14.82
Ringed seal	muscle	2002	-19.34	14.4
Ringed seal	muscle	2002	-16.79	15.73
Ringed seal	muscle	2002	-19.37	15.03
Ringed seal	muscle	2002	-18.49	15.69
Ringed seal	muscle	2002	-19.71	13.61
Ringed seal	muscle	2002	-18.87	15.55
Ringed seal	muscle	2002	-19.87	14.55
Ringed seal	muscle	2002	-18.97	15.18
Ringed seal	muscle	2002	-18.37	16.57
Ringed seal	muscle	2002	-18.27	15.78
Ringed seal	muscle	2002	-18.62	14.35
Ringed seal	muscle	2002	-19.86	16.15
Ringed seal	muscle	2002	-18.21	17.16
Ringed seal	muscle	2002	-19.27	14.85
Ringed seal	muscle	2002	-19.17	14.15
Ringed seal	muscle	2002	-19.24	15.47
Ringed seal	muscle	2002	-19.27	15.64
Ringed seal	muscle	2002	-18.07	14.96
Ringed seal	muscle	2002	-19.11	15.94
Ringed seal	muscle	2002	-19.32	15.68
Ringed seal	muscle	2002	-19.37	15.22
Ringed seal	muscle	2002	-18.93	15.2
Ringed seal	muscle	2002	-18.71	13.89
Ringed seal	muscle	2002	-18.59	15.92
Ringed seal	muscle	2006	-19.84	16.6
Ringed seal	muscle	2006	-19.93	13.82
Ringed seal	muscle	2006	-19.34	14.45
Ringed seal	muscle	2006	-19.32	15.81
Ringed seal	muscle	2006	-19.2	16.05
Ringed seal	muscle	2006	-18.87	14
Ringed seal	muscle	2006	-19.6	15.82
Ringed seal	muscle	2006	-19.01	14.25
Ringed seal	muscle	2006	-19.27	15.93
Ringed seal	muscle	2006	-19.25	13.93
Ringed seal	muscle	2006	-19.2	15.36
Ringed seal	muscle	2006	-19.1	14.12
Ringed seal	muscle	2006	-20.03	14.8
Ringed seal	muscle	2006	-19.06	15.46
Ringed seal	muscle	2006	-19.91	15.47
Ringed seal	muscle	2006	-18.77	13.72
Ringed seal	muscle	2006	-19.24	15.21
Ringed seal	muscle	2006	-19.81	14.79
Ringed seal	muscle	2006	-19.75	14.62
Ringed seal	muscle	2006	-19.37	16.4
Ringed seal	muscle	2006	-20.1	15.91
Ringed seal	muscle	2006	-19.18	14.64
Ringed seal	muscle	2006	-18.33	15.62
Ringed seal	muscle	2006	-19.44	15.31
Ringed seal	muscle	2007	-17.9	14.23
Ringed seal	muscle	2007	-18.61	14.53
Ringed seal	muscle	2007	-18.35	14.12
Ringed seal	muscle	2008	-18.94	15.99
Ringed seal	muscle	2008	-18.71	14.78
Ringed seal	muscle	2008	-17.94	15.02
Ringed seal	muscle	2008	-18.1	14.32
Ringed seal	muscle	2008	-18.26	13.78
Ringed seal	muscle	2008	-18.45	15.63
Ringed seal	muscle	2008	-19.09	14.19
Ringed seal	muscle	2009	-18.41	15.84
Ringed seal	muscle	2009	-18.7	15.28
Ringed seal	muscle	2009	-18.58	13.37
Ringed seal	muscle	2009	-18.84	14.55
Ringed seal	muscle	2009	-18.78	13.89
Ringed seal	muscle	2009	-19.03	14.08
Ringed seal	muscle	2010	-19.27	15.73
Ringed seal	muscle	2011	-19.77	15.32
Ringed seal	muscle	2011	-19.38	15.83
Ringed seal	muscle	2011	-19.63	14.94
Ringed seal	muscle	2011	-19.44	14.67
Ringed seal	muscle	2011	-19.21	14.88
Ringed seal	muscle	2011	-19.07	15.73
Ringed seal	muscle	2011	-19.24	16.22
Ringed seal	muscle	2011	-19.6	14.25
Ringed seal	muscle	2011	-19.61	15.28
Ringed seal	muscle	2011	-19.66	15.78
Ringed seal	muscle	2011	-18.94	15.46
Ringed seal	muscle	2011	-18.89	15.54
Greenland halibut	muscle	1996	-19.58	17
Greenland halibut	muscle	1996	-20.16	16.31
Greenland halibut	muscle	1996	-18.74	17.3
Greenland halibut	muscle	1996	-19.83	16
Greenland halibut	muscle	1996	-20.64	16.43
Greenland halibut	muscle	1996	-20.03	16.44
Greenland halibut	muscle	1996	-20.73	16.43
Greenland halibut	muscle	1996	-19.61	16.63
Greenland halibut	muscle	1996	-18.47	17.35
Greenland halibut	muscle	1996	-19	16
Greenland halibut	muscle	1996	-20.17	16.75
Greenland halibut	muscle	1996	-19.38	16.56
Greenland halibut	muscle	1996	-18.97	16.87
Greenland halibut	muscle	1996	-19.53	16.7
Greenland halibut	muscle	2012	-19.33	16.54
Greenland halibut	muscle	2012	-19.52	15.53
Greenland halibut	muscle	2012	-18.62	17.83
Greenland halibut	muscle	2012	-19.4	15.99
Greenland halibut	muscle	2012	-18.91	16.03
Greenland halibut	muscle	2012	-19.08	15.86
Greenland halibut	muscle	2012	-19.07	16.35
Greenland halibut	muscle	2012	-19.71	16.25
Greenland halibut	muscle	2012	-20.08	15.92
Greenland halibut	muscle	2012	-18.9	15.9
Greenland halibut	muscle	2012	-19.63	15.95
Greenland halibut	muscle	2012	-18.43	17.99
Greenland halibut	muscle	2012	-19.41	16.32
Greenland halibut	muscle	2012	-19.37	15.84
Greenland halibut	muscle	2012	-19.18	15.97
Greenland halibut	muscle	2012	-18.56	17.8
Greenland halibut	muscle	2012	-18.38	17.23
Greenland halibut	muscle	2012	-19.05	16.3
Greenland halibut	muscle	2012	-19.01	16.65
Greenland halibut	muscle	2012	-19.34	16.39
Greenland halibut	muscle	2012	-19.21	16.1
Arctic char	muscle	2002	-20.3501	15.0183
Arctic char	muscle	2002	-20.3091	15.6658
Arctic char	muscle	2002	-19.6526	15.5427
Arctic char	muscle	2002	-20.2591	14.4578
Arctic char	muscle	2002	-20.6698	13.8784
Arctic char	muscle	2002	-20.7858	14.5659
Arctic char	muscle	2002	-20.0613	14.7611
Arctic char	muscle	2002	-20.2441	15.8149
Arctic char	muscle	2002	-20.7868	15.0613
Arctic char	muscle	2002	-21.0616	15.1634
Arctic char	muscle	2002	-21.2604	13.8443
Arctic char	muscle	2002	-19.5906	13.7372
Arctic char	muscle	2002	-20.3391	14.4668
Arctic char	muscle	2002	-20.496	14.4018
Arctic char	muscle	2002	-20.5189	14.2857
Arctic char	muscle	2002	-20.5339	14.5129
Arctic char	muscle	2002	-20.6888	15.1724
Arctic char	muscle	2002	-20.9566	14.0755
Arctic char	muscle	2002	-21.1005	14.8461
Arctic char	muscle	2002	-20.5669	14.1085
Arctic char	muscle	2002	-20.3787	14.4061
Arctic char	muscle	2002	-20.413	14.7441
Arctic char	muscle	2002	-20.5719	14.1686
Arctic char	muscle	2002	-20.427	13.7923
Arctic char	muscle	2002	-20.5699	13.9044
Arctic char	muscle	2002	-20.2272	15.4606
Arctic char	muscle	2002	-20.487	14.9092
Arctic char	muscle	2002	-20.0543	14.5749
Arctic char	muscle	2002	-20.7088	13.8774
Arctic char	muscle	2002	-20.9926	13.9114
Arctic char	muscle	2002	-19.5067	15.3606
Arctic char	muscle	2002	-19.7545	15.5417
Arctic char	muscle	2002	-19.6246	15.7929
Arctic char	muscle	2002	-19.2299	15.6007
Arctic char	muscle	2002	-19.4927	15.4857
Arctic char	muscle	2002	-19.6695	15.2875
Arctic char	muscle	2002	-19.6586	15.5307
Arctic char	muscle	2002	-19.4677	15.0493
Arctic char	muscle	2002	-19.4427	15.7699
Arctic char	muscle	2002	-19.5356	16.3654
Arctic char	muscle	2002	-19.5876	15.5534
Arctic char	muscle	2002	-19.1439	15.7759
Arctic char	muscle	2002	-19.4547	15.902
Arctic char	muscle	2002	-19.6366	15.2715
Arctic char	muscle	2002	-19.6286	15.4316
Arctic char	muscle	2002	-20.0753	14.3007
Arctic char	muscle	2002	-19.2039	15.0433
Arctic char	muscle	2002	-19.7865	15.6348
Arctic char	muscle	2002	-19.4787	14.5409
Arctic char	muscle	2002	-19.2538	15.3455
Arctic char	muscle	2002	-19.5147	14.635
Arctic char	muscle	2002	-19.5556	15.0053
Arctic char	muscle	2002	-19.1899	15.0143
Arctic char	muscle	2002	-19.9077	14.3234
Arctic char	muscle	2002	-19.4887	15.6408
Arctic char	muscle	2002	-19.3818	15.0163
Arctic char	muscle	2002	-19.7295	15.1994
Arctic char	muscle	2002	-19.8744	15.2104
Arctic char	muscle	2002	-19.4797	14.711
Arctic char	muscle	2002	-19.7305	15.3656
Arctic char	muscle	2002	-19.6636	15.6428
Arctic char	muscle	2002	-19.4997	15.964
Arctic char	muscle	2002	-19.5936	15.4857
Arctic char	muscle	2002	-19.6486	15.2775
Arctic char	muscle	2002	-19.5306	15.1744
Arctic char	muscle	2002	-19.6236	15.3535
Arctic char	muscle	2002	-19.6775	14.4632
Arctic char	muscle	2002	-19.3168	16.3453
Arctic char	muscle	2002	-20.2222	14.9903
Arctic char	muscle	2002	-19.6735	15.2825
Arctic char	muscle	2002	-19.6206	15.5377
Arctic char	muscle	2002	-19.4447	14.7461
Arctic char	muscle	2004	-19.6949	14.7608
Arctic char	muscle	2004	-20.452	14.387
Arctic char	muscle	2004	-20.0153	14.8038
Arctic char	muscle	2004	-19.7454	14.4201
Arctic char	muscle	2004	-19.522	14.6595
Arctic char	muscle	2004	-19.9941	13.393
Arctic char	muscle	2004	-20.4217	14.3319
Arctic char	muscle	2004	-20.364	13.8247
Arctic char	muscle	2004	-20.232	13.9598
Arctic char	muscle	2004	-19.8698	14.3499
Arctic char	muscle	2004	-19.707	14.5323
Arctic char	muscle	2004	-19.8445	14.2868
Arctic char	muscle	2004	-20.1397	13.8679
Arctic char	muscle	2004	-19.9132	13.7848
Arctic char	muscle	2004	-19.5756	14.1876
Arctic char	muscle	2004	-20.2084	13.9461
Arctic char	muscle	2004	-20.2307	13.7828
Arctic char	muscle	2004	-20.2509	13.1845
Arctic char	muscle	2004	-19.6332	14.1746
Arctic char	muscle	2004	-19.429	14.7257
Arctic char	muscle	2004	-18.8791	14.7858
Arctic char	muscle	2004	-18.4842	13.6789
Arctic char	muscle	2004	-19.3249	14.4912
Arctic char	muscle	2004	-19.4411	15.1886
Arctic char	muscle	2004	-19.3198	15.1876
Arctic char	muscle	2004	-19.1096	14.2657
Arctic char	muscle	2004	-18.8023	15.0233
Arctic char	muscle	2004	-18.7325	14.3239
Arctic char	muscle	2004	-19.2622	15.9832
Arctic char	muscle	2004	-19.1005	14.5393
Arctic char	muscle	2004	-18.9034	13.8078
Arctic char	muscle	2004	-19.0014	14.8309
Arctic char	muscle	2004	-19.3795	14.2116
Arctic char	muscle	2004	-19.1217	14.3339
Arctic char	muscle	2004	-19.5833	14.9388
Arctic char	muscle	2004	-19.4088	13.6425
Arctic char	muscle	2004	-20.1417	15.5113
Arctic char	muscle	2004	-19.333	14.7748
Arctic char	muscle	2004	-19.7869	14.6195
Arctic char	muscle	2004	-19.6403	15.2738
Arctic char	muscle	2008	-19.3916	14.4822
Arctic char	muscle	2008	-19.7434	14.4752
Arctic char	muscle	2008	-20.1336	14.0142
Arctic char	muscle	2008	-19.4988	14.864
Arctic char	muscle	2008	-19.2198	15.0974
Arctic char	muscle	2008	-20.3328	14.5032
Arctic char	muscle	2008	-20.2832	15.6987
Arctic char	muscle	2008	-20.514	15.0857
Arctic char	muscle	2008	-19.8718	16.5464
Arctic char	muscle	2008	-19.6191	14.3219
Arctic char	muscle	2008	-19.6898	14.5764
Arctic char	muscle	2008	-20.0922	14.6255
Arctic char	muscle	2008	-19.9982	15.1295
Arctic char	muscle	2008	-20.4884	15.4211
Arctic char	muscle	2008	-20.8655	14.6325
Arctic char	muscle	2008	-20.2236	15.7638
Arctic char	muscle	2008	-19.8445	15.5283
Arctic char	muscle	2008	-19.9719	14.5613
Arctic char	muscle	2008	-20.5167	14.4171
Arctic char	muscle	2008	-20.4975	14.9642
Arctic char	muscle	2008	-19.4112	13.9802
Arctic char	muscle	2008	-18.9639	15.8063
Arctic char	muscle	2008	-19.6672	15.0103
Arctic char	muscle	2008	-19.4359	14.8491
Arctic char	muscle	2008	-19.6414	14.5401
Arctic char	muscle	2008	-20.0409	15.688
Arctic char	muscle	2008	-19.6013	14.5872
Arctic char	muscle	2008	-19.9591	14.6765
Arctic char	muscle	2008	-19.5612	15.5705
Arctic char	muscle	2008	-19.5351	14.6304
Arctic char	muscle	2008	-18.9448	14.9003
Arctic char	muscle	2008	-19.8228	15.2364
Arctic char	muscle	2008	-18.8165	14.6083
Arctic char	muscle	2008	-19.1964	14.6745
Arctic char	muscle	2008	-19.4757	15.6351
Arctic char	muscle	2008	-19.6454	14.7749
Arctic char	muscle	2008	-19.6765	14.6745
Arctic char	muscle	2008	-19.7118	14.2219
Arctic char	muscle	2008	-19.3477	14.6442
Arctic char	muscle	2008	-19.2823	13.7144
Arctic char	muscle	2008	-19.4259	13.2676
Arctic char	muscle	2008	-19.0323	13.4413
Arctic char	muscle	2008	-19.3787	14.3159
Arctic char	muscle	2008	-19.5755	14.6061
Arctic char	muscle	2008	-19.8958	15.2367
Arctic char	muscle	2008	-19.0591	15.9799
Arctic char	muscle	2011	-18.8952	14.5628
Arctic char	muscle	2011	-18.6567	14.214
Arctic char	muscle	2011	-18.6627	14.7469
Arctic char	muscle	2011	-18.36	13.7357
Arctic char	muscle	2011	-19.3292	14.6184
Arctic char	muscle	2011	-19.3883	14.8095
Arctic char	muscle	2011	-18.5515	14.398
Arctic char	muscle	2011	-18.6006	15.1837
Arctic char	muscle	2011	-18.7078	14.8894
Arctic char	muscle	2011	-19.2189	15.5396
Arctic char	muscle	2011	-18.7873	15.7409
Arctic char	muscle	2011	-18.7509	14.8055
Arctic char	muscle	2011	-18.9253	15.571
Arctic char	muscle	2011	-19.1007	14.6296
Arctic char	muscle	2011	-18.5906	16.2363
Arctic char	muscle	2011	-18.8752	14.4708
Arctic char	muscle	2011	-17.5643	13.9783
Arctic char	muscle	2011	-18.6838	14.2099
Arctic char	muscle	2011	-18.7148	13.8843
Arctic char	muscle	2011	-18.8201	15.8127
Arctic char	muscle	2011	-18.6747	15.4405
Arctic char	muscle	2011	-19.2009	14.3171
Arctic char	muscle	2011	-18.5885	15.481
Arctic char	muscle	2011	-19.232	14.7094
Arctic char	muscle	2011	-18.9032	14.576
Arctic char	muscle	2011	-19.1247	13.9096
Arctic char	muscle	2011	-19.0496	14.6124
Arctic char	muscle	2011	-18.3971	14.3525
Arctic char	muscle	2011	-18.8942	15.7702
Arctic char	muscle	2011	-18.9293	14.8904
Arctic char	muscle	2011	-18.7128	15.572
Arctic char	muscle	2011	-18.8862	14.5992
Arctic char	muscle	2011	-18.7118	14.4516
Arctic char	muscle	2011	-18.9453	14.5466
Arctic char	muscle	2011	-18.6377	14.3548
Arctic char	muscle	2011	-18.9153	14.9198
Arctic char	muscle	2011	-18.9794	14.4162
Arctic char	muscle	2011	-18.4853	14.9521
Arctic char	muscle	2011	-18.5046	15.6634
Arctic char	muscle	2011	-18.9557	15.3374
Arctic char	muscle	2011	-18.7377	15.397
Arctic char	muscle	2011	-19.1838	14.5906
Arctic char	muscle	2011	-18.6443	14.2212
Arctic char	muscle	2011	-18.5438	15.2577
Arctic char	muscle	2011	-19.2732	14.8429
Arctic char	muscle	2011	-18.807	14.9004
Arctic char	muscle	2011	-18.6191	14.5734
Arctic char	muscle	2011	-18.1218	16.8129
Arctic char	muscle	2011	-18.7046	16.0489
Arctic char	muscle	2011	-18.6568	15.069
Arctic char	muscle	2011	-18.7407	14.8479
Arctic char	muscle	2011	-18.7528	15.9641
Arctic char	muscle	2011	-18.8754	15.1144
Arctic char	muscle	2011	-19.3486	15.4878
Arctic char	muscle	2011	-18.4815	15.2738
Arctic char	muscle	2011	-18.9206	15.7835
Arctic char	muscle	2011	-18.4534	14.9206
Arctic char	muscle	2011	-19.3084	15.297
Arctic char	muscle	2011	-18.9196	15.3939
Arctic char	muscle	2011	-18.3097	13.4219
Arctic char	muscle	2011	-19.3305	15.7633
Arctic char	muscle	2011	-18.662	15.1968
Arctic char	muscle	2011	-18.6057	15.4412
Arctic char	muscle	2011	-19.1073	15.1384
Arctic char	muscle	2011	-18.5104	16.2054
Arctic char	muscle	2011	-18.7556	15.0476
Arctic char	muscle	2011	-19.0931	15.4993
Arctic char	muscle	2011	-18.7323	15.312
Arctic char	muscle	2011	-18.4263	15.2479
Arctic char	muscle	2011	-18.7202	16.3927
Arctic char	muscle	2011	-18.1071	15.6766
Arctic char	muscle	2011	-18.6736	14.7381
Arctic char	muscle	2011	-18.781	15.6986
Arctic char	muscle	2011	-18.86	15.5674
Arctic char	muscle	2011	-18.7597	15.0389
Arctic char	muscle	2011	-18.6239	15.4983
